# Supplementary material
Source: publisher site journal article supplement (https://www.dovepress.com/article/528349)

Self-assembled nanoparticles loaded with PI3K $\gamma$  inhibitors for  
detoxification of doxorubicin-induced cardiotoxicity and enhancement of  
antitumor therapy

**List of Supplementary Figures**

*Figure S1. The characteristic peak and standard curve of PI3K $\gamma$  inhibitor.*

*Figure S2. The fluorescence intensity of DiD of DiD-labeled GPP/NPs and DiD labeled PGPP/NPs .*

*Figure S3. Assessment of biosafety of PGPP/NPs in BALB/c mice.*

*Figure S4. Determination of IC<sub>50</sub> values of Dox to H9C2 cells).*

*Figure S5. The expression levels of IL-6 and TNF- $\alpha$  in control and EAM groups.*

*Figure S6. Determination of the maximal tolerated dosage (MTD) of Dox by analyzing body weight and survival rate of BALB/c mice.*

*Figure S7. The blood biochemical indexes in the control group and the DOX groups.*

*Figure S8. Tumor volume changes of mice in different treatment groups.*

Figure S1. The characteristic peak and standard curve of PI3K $\gamma$  inhibitor.

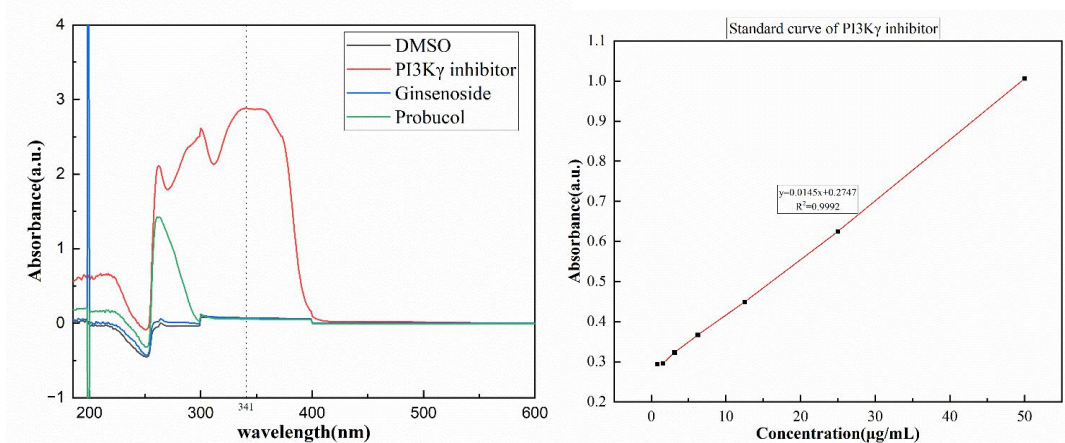

Figure S2. The fluorescence intensity of DiD of DiD-labeled GPP/NPs and DiD labeled PGPP/NPs. (n = 3). Data are presented as the mean  $\pm$  SD. \* $p < 0.05$ ; \*\* $p < 0.01$ ; \*\*\* $p < 0.001$ ; \*\*\*\* $p < 0.0001$ .

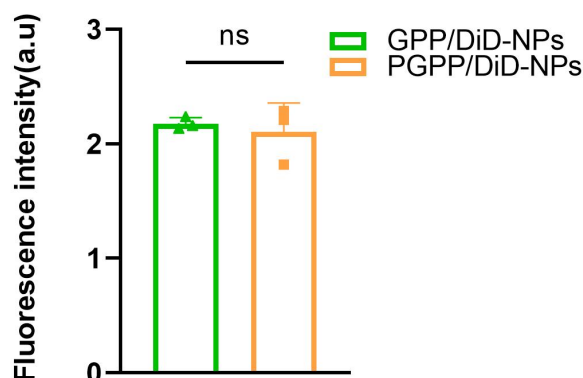

Figure S3. Assessment of biosafety of PGPP/NPs in BALB/c mice. A) Major hematological analysis, including assessment of white blood cell (WBC), red blood cell (RBC), hemoglobin (HGB), mean corpuscular volume (MCV), and platelet (PLT) (n = 3). B) Blood biochemistry data showing hepatic function-related enzymes and proteins including alanine aminotransferase (ALT), aspartate aminotransferase (AST); renal function-associated components including blood urea nitrogen (UREA) and creatinine (CREA)(n = 3). C) Hematoxylin and eosin (HE) staining images of the major organs including heart, liver, spleen, lungs and kidneys. Scale bars, 100  $\mu$ m. Data are presented as the mean  $\pm$  SD.

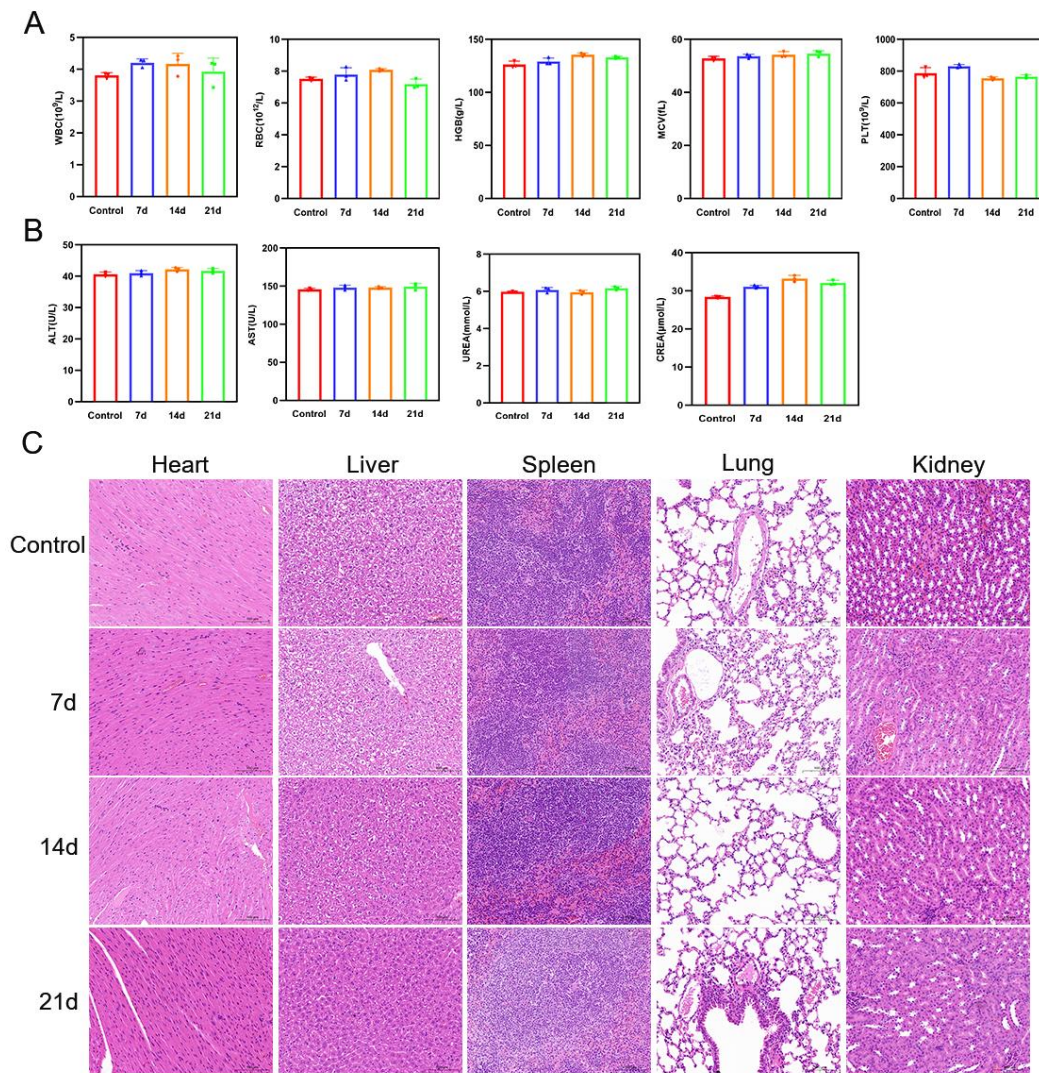

Figure S4. Determination of IC<sub>50</sub> values of Dox to H9C2 cells (n = 4). Data are presented as the mean ± SD.

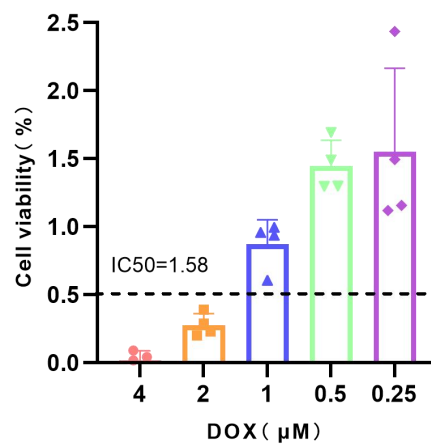

Figure S5. The expression levels of IL-6 and TNF- $\alpha$  in control and EAM groups. (n = 3). Data are presented as the mean  $\pm$  SD. \* $p < 0.05$ ; \*\* $p < 0.01$ ; \*\*\* $p < 0.001$ ; \*\*\*\* $p < 0.0001$ .

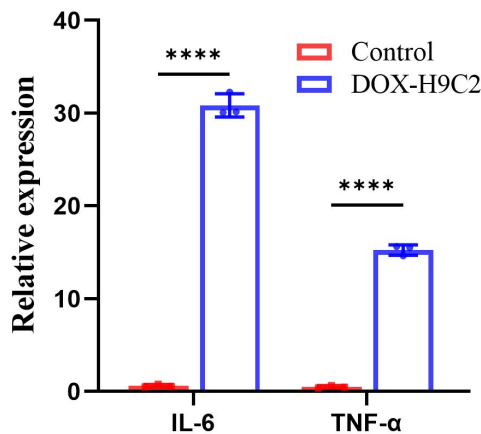

Figure S6. Determination of the maximal tolerated dosage (MTD) of Dox by analyzing body weight and survival rate of BALB/c mice. (n = 3). Data are presented as the mean  $\pm$  SD.

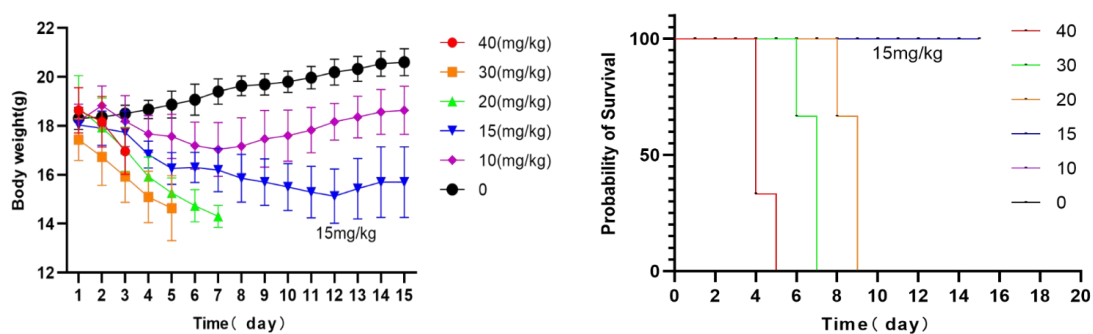

Figure S7. The blood biochemical indexes in the control group and the DOX groups (n = 3). Data are presented as the mean  $\pm$  SD. \* $p < 0.05$ ; \*\* $p < 0.01$ ; \*\*\* $p < 0.001$ ; \*\*\*\* $p < 0.0001$ .

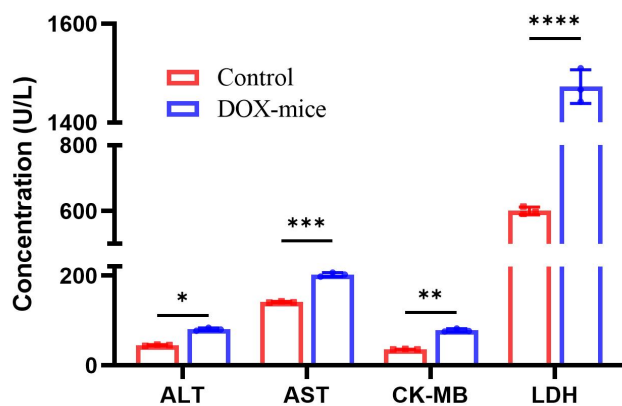

Figure S8. Tumor volume changes of mice in different treatment groups (n = 3). Data are presented as the mean  $\pm$  SD.

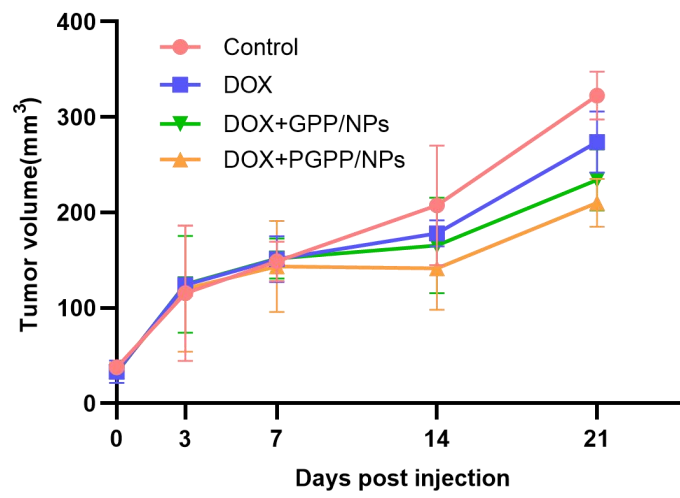

Supplement: Supplementary file 1 [file Supplementary%20Figures_1.pdf]
